# Supplementary material for: Leaf-inspired interwoven carbon nanosheet/nanotube homostructures for supercapacitors with high energy and power densities
Source: Royal Society of Chemistry journal article supplement (doi:10.1039/c7ta04952h), 2017-01-01
Supplement: c7ta04952h1.pdf [file c7ta04952h1.pdf]

# **Leaf-inspired interwoven carbon nanosheet/nanotube homostructure for supercapacitors with high energy and power densities**

**Siliang Liu,<sup>a</sup> Jingsan Xu,<sup>b</sup> Jixin Zhu,<sup>c</sup> Yuanqin Chang,<sup>d</sup> Haige Wang,<sup>a</sup> Zhichong  
Liu,<sup>a</sup> Yang Xu,<sup>a</sup> Chao Zhang\*<sup>a</sup> and Tianxi Liu\*<sup>a</sup>**

<sup>a</sup> State Key Laboratory for Modification of Chemical Fibers and Polymer Materials,  
College of Materials Science and Engineering, Donghua University, Shanghai 201620,  
P. R. China

<sup>b</sup> School of Chemistry, Physics and Mechanical Engineering, Queensland University  
of Technology, Brisbane, QLD 4001, Australia

<sup>c</sup> Key Laboratory of Flexible Electronics (KLOFE) & Institute of Advanced Materials  
(IAM), Jiangsu National Synergetic Innovation Center for Advanced Materials  
(SICAM), Nanjing Tech University, 30 South Puzi Road, Nanjing 211816, China

<sup>d</sup> CAT Catalytic Center, RWTH Aachen University, Worringerweg 2, D-52074  
Aachen, Germany

\* E-mail: czhang@dhu.edu.cn (C. Zhang)

\* E-mail: txliu@fudan.edu.cn or txliu@dhu.edu.cn (T. X. Liu)

## Electronic Supplementary Information

### Figure captions:

**Fig. S1** SEM images of (a, b) CNSs and (c, d) CNTs at low and high magnifications, respectively.

**Fig. S2** SEM images of (a, b) CNT-CNS-1, (c, d) CNT-CNS-2 and (e, f) CNT-CNS-3 at low and high magnifications, respectively.

**Fig. S3** SEM images of leaf-inspired interwoven CNT-CNS-2 at different magnifications.

**Fig. S4** HETEM images of (a-c) CNSs, (d-f) CNT-CNS-2 at different magnifications.

**Fig. S5** Elemental compositions of CNTs, CNT-CNS sandwiches and CNSs.

**Fig. S6** (a) XPS survey spectra of CNT-CNS-1 and CNT-CNS-3. C1s XPS spectra of (b) CNT-CNS-1 and (c) CNT-CNS-3.

**Fig. S7** (a) Nitrogen adsorption-desorption isotherms and (b) pore size distributions of CNT-CNS-1 and CNT-CNS-3, respectively.

**Fig. S8** (a) Comparison of CV curves of CNT-CNS-4 and CNT-CNS-5 at a scan rate of  $10 \text{ mV s}^{-1}$ . (b) Specific capacitances of CNT-CNS-4 and CNT-CNS-5 at various discharge current densities.

**Fig. S9** (a) Comparison of CV curves of neat graphite paper at a scan rate of  $10 \text{ mV s}^{-1}$ . (b) Specific capacitances of neat graphite paper at various discharge current densities.

**Fig. S10** Ragone plots for assembled symmetric supercapacitors with CNT-CNS sandwiches.

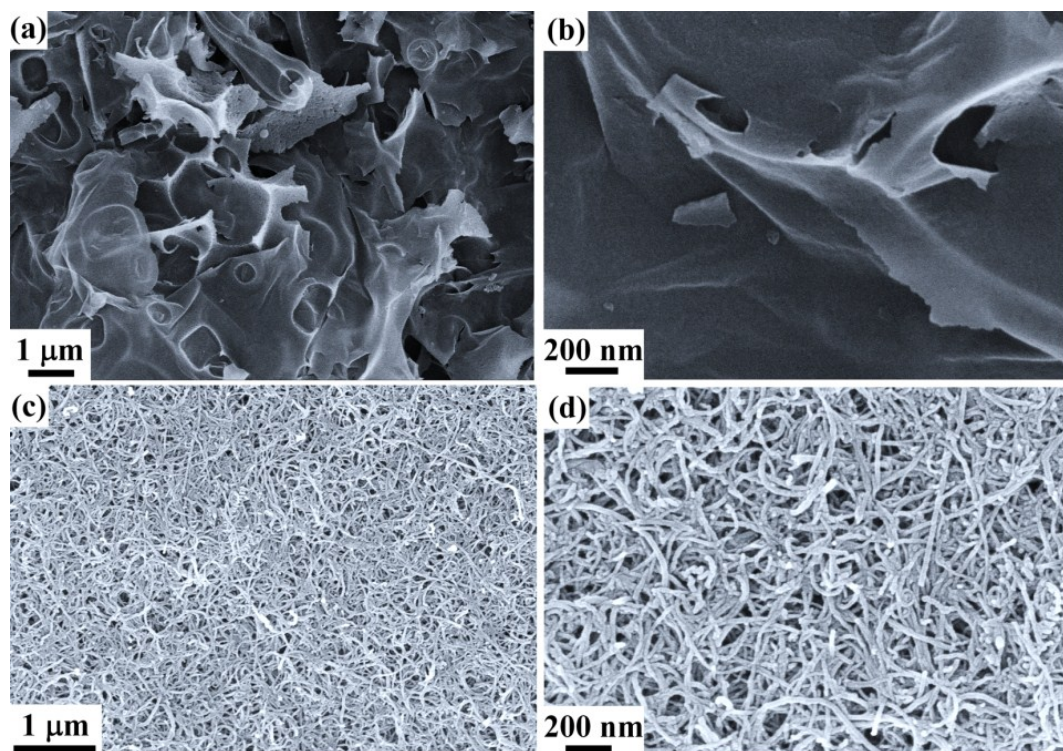

**Fig. S1** SEM images of (a, b) CNSs and (c, d) CNTs at low and high magnifications, respectively.

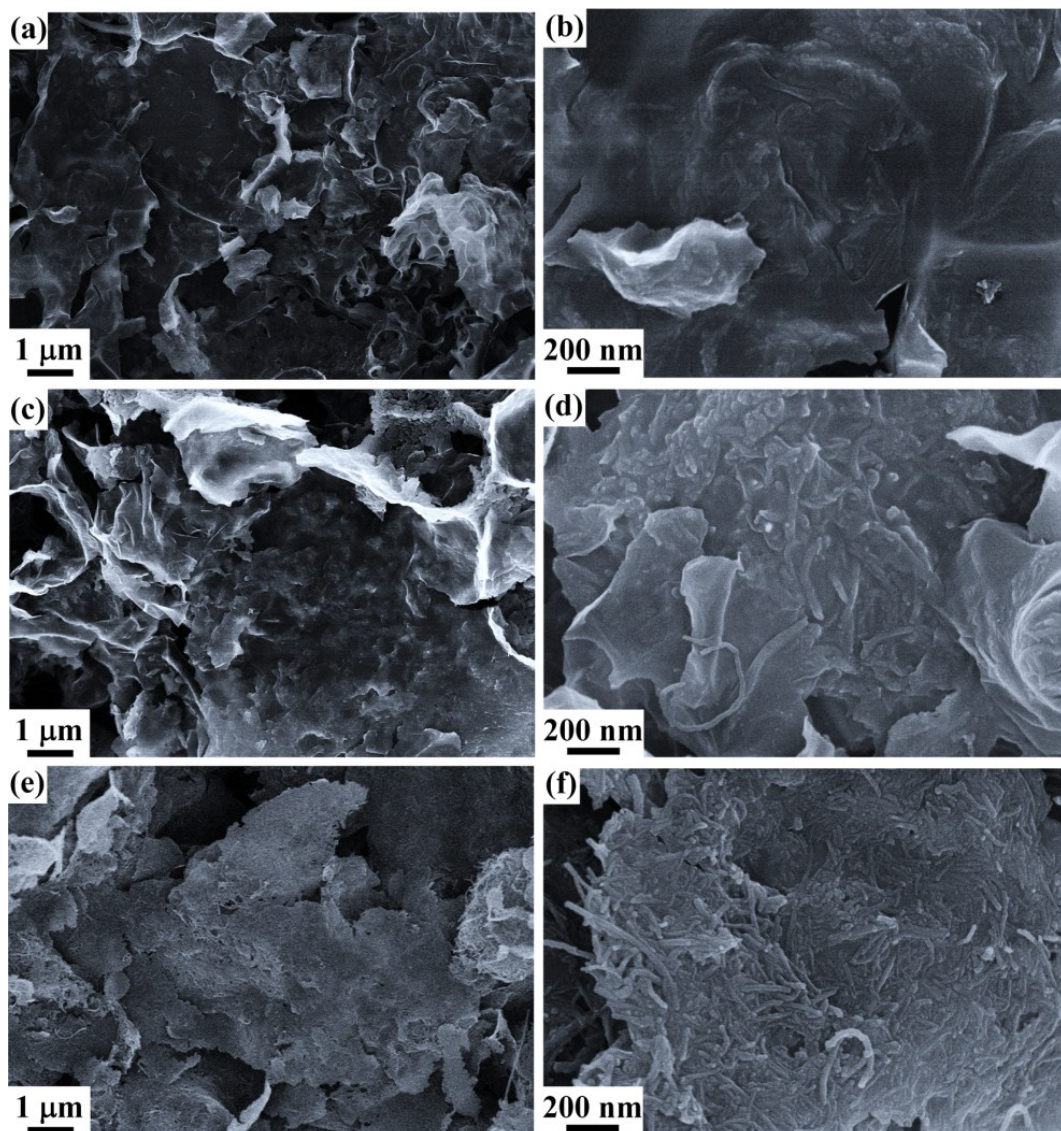

**Fig. S2** SEM images of (a, b) CNT-CNS-1, (c, d) CNT-CNS-2 and (e, f) CNT-CNS-3 at low and high magnifications, respectively.

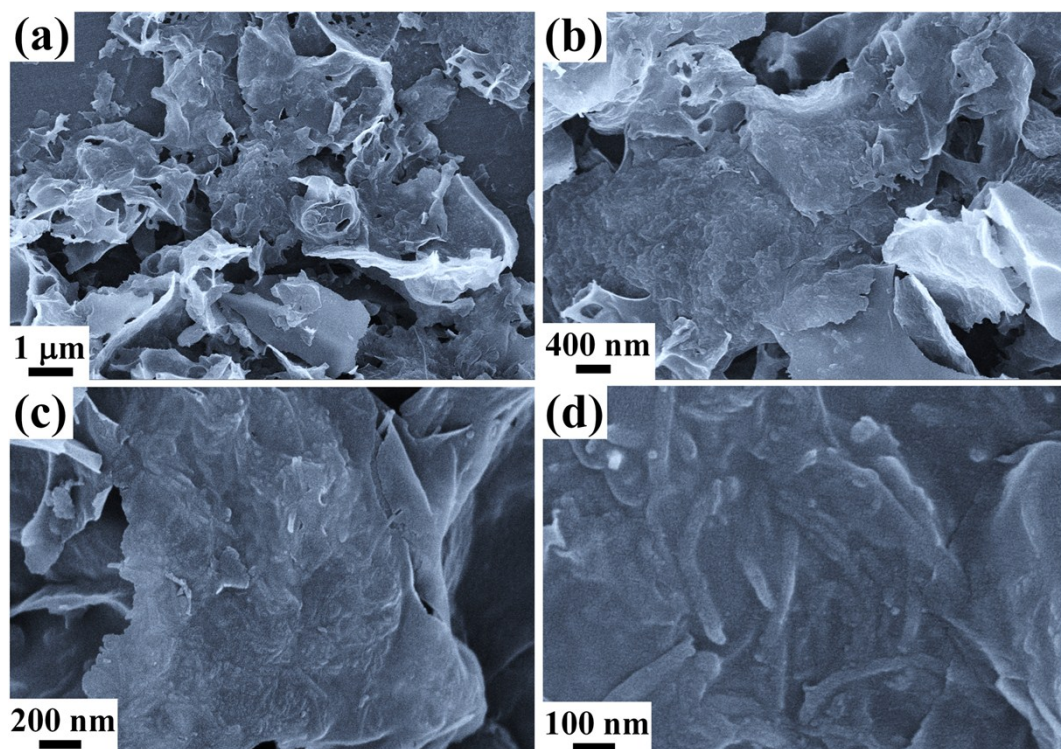

**Fig. S3** SEM images of leaf-inspired interwoven CNT-CNS-2 at different magnifications.

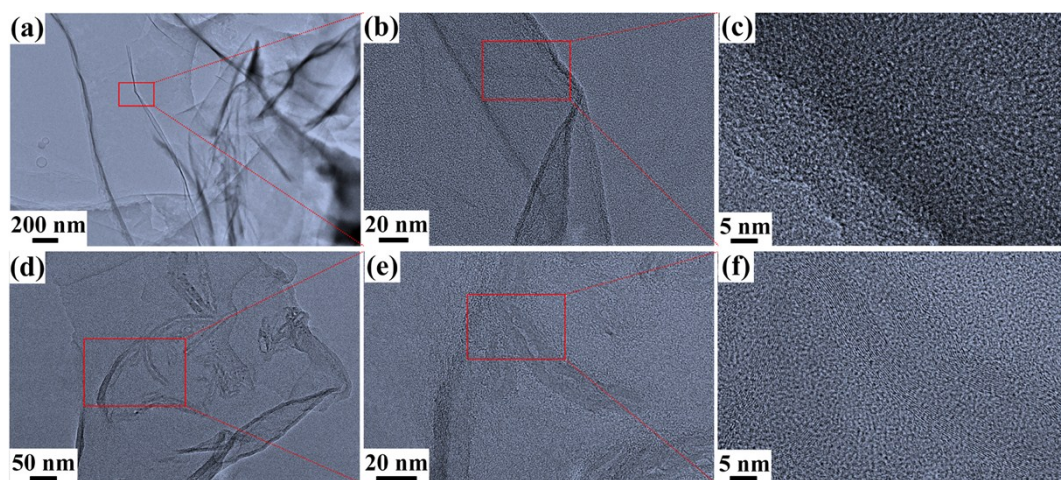

**Fig. S4** HETEM images of (a-c) CNSs, (d-f) CNT-CNS-2 at different magnifications.

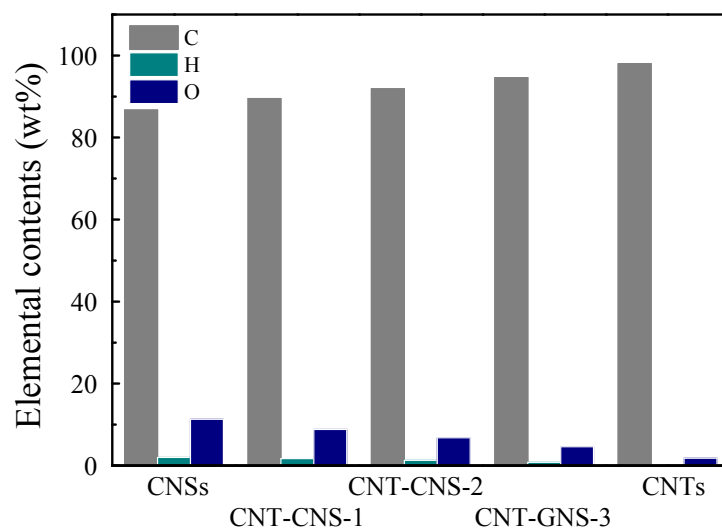

**Fig. S5** Elemental compositions of CNTs, CNT-CNS sandwiches and CNSs.

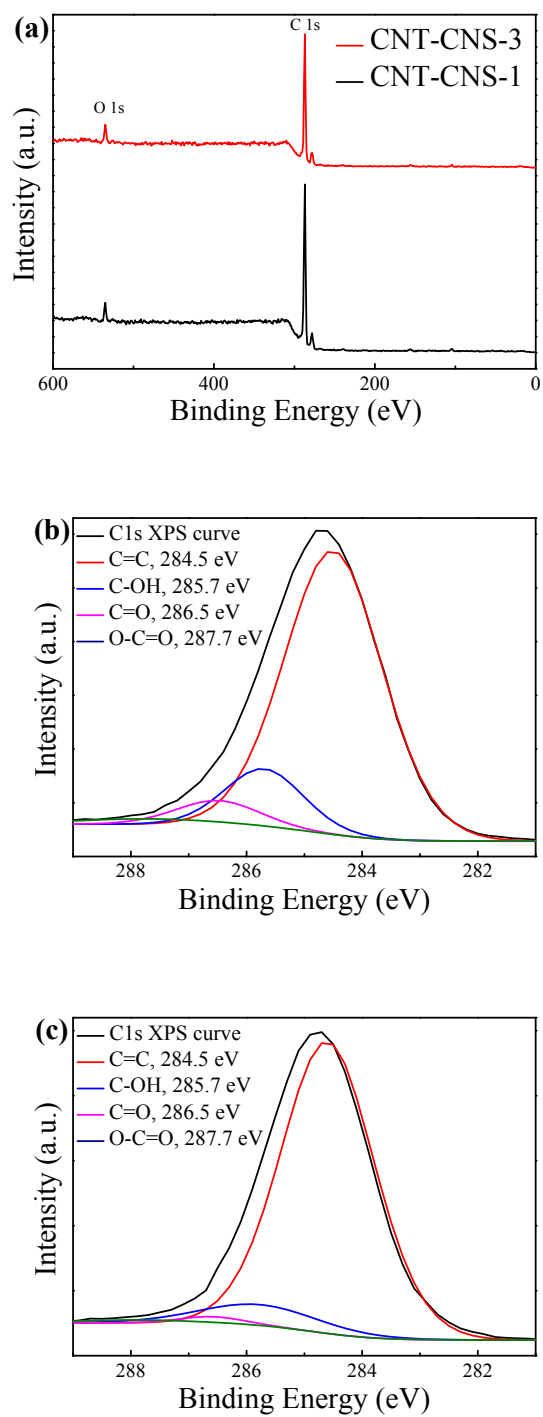

**Fig. S6** (a) XPS survey spectra of CNT-CNS-1 and CNT-CNS-3. C1s XPS spectra of (b) CNT-CNS-1 and (c) CNT-CNS-3.



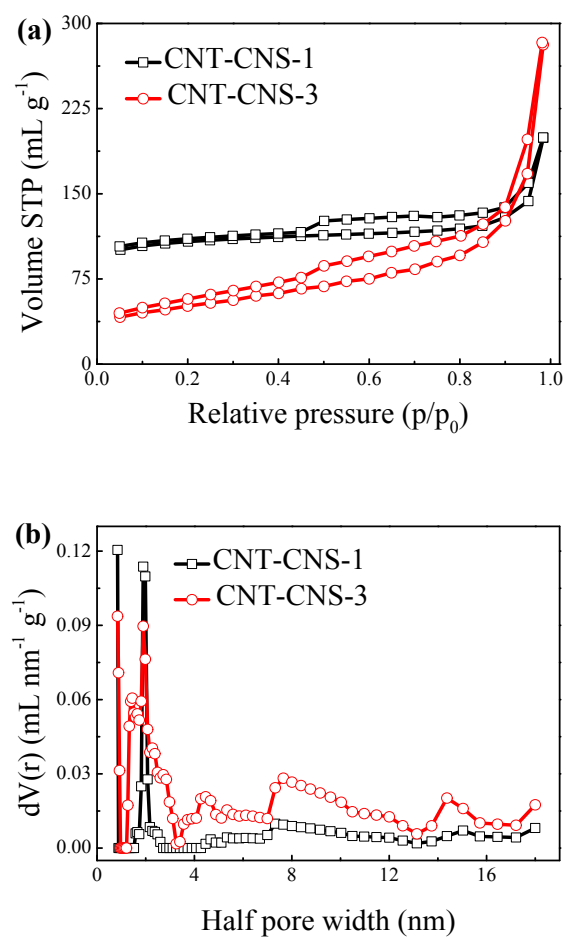

**Fig. S7** (a) Nitrogen adsorption-desorption isotherms and (b) pore size distributions of CNT-CNS-1 and CNT-CNS-3, respectively.

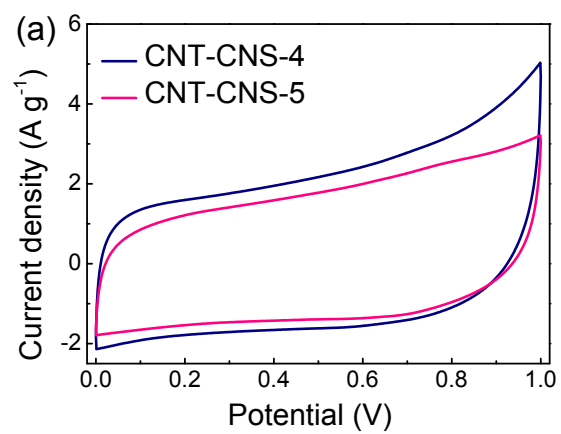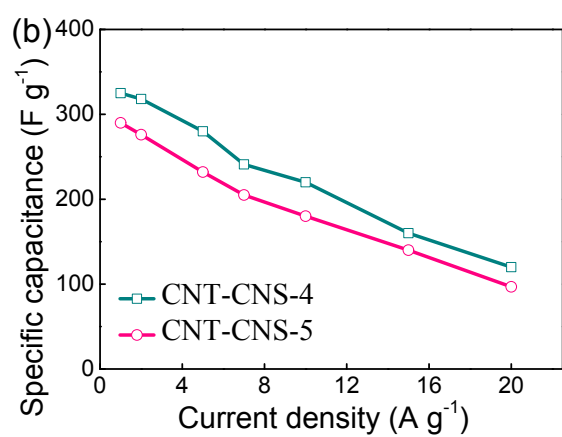

**Fig. S8** (a) Comparison of CV curves of CNT-CNS-4 and CNT-CNS-5 at a scan rate of 10 mV s<sup>-1</sup>.

(b) Specific capacitances of CNT-CNS-4 and CNT-CNS-5 at various discharge current densities.

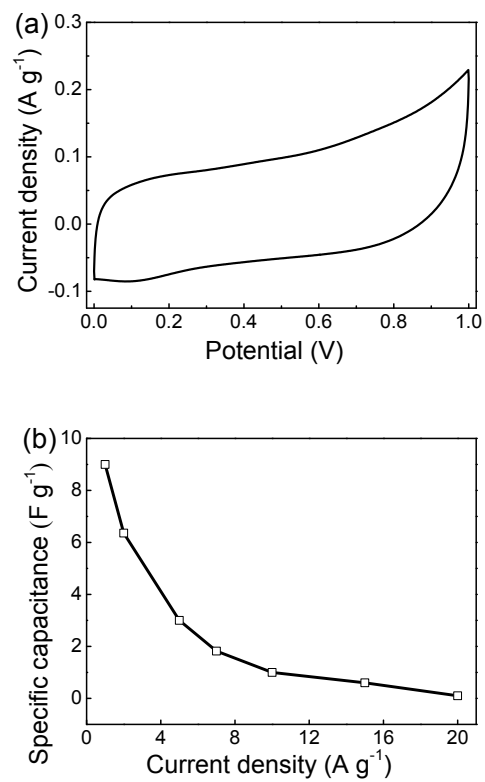

**Fig. S9** (a) Comparison of CV curves of neat graphite paper at a scan rate of 10 mV s<sup>-1</sup>. (b) Specific capacitances of neat graphite paper at various discharge current densities.

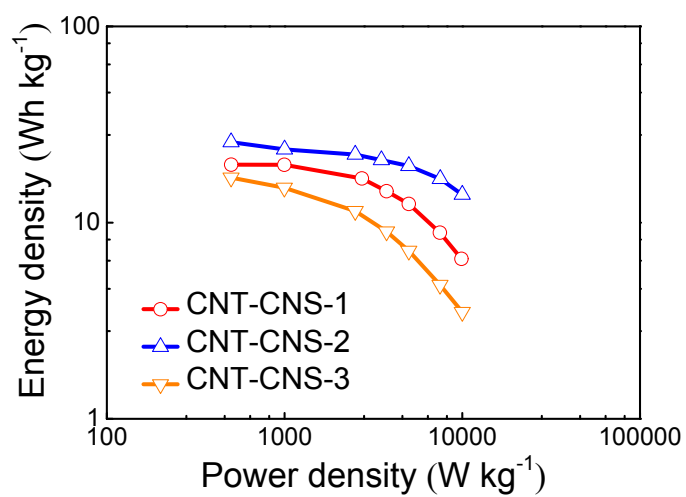

**Fig. S10** Ragone plots for assembled symmetric supercapacitors with CNT-CNS sandwiches.

**Table S1.** The electrical conductivity parameters of CNSs, CNT-CNS sandwiches and CNTs.

| Sample    | Resistivity<br>[ $\Omega$ cm] | Conductivity<br>[S m <sup>-1</sup> ] |
|-----------|-------------------------------|--------------------------------------|
| CNSs      | 4.92                          | 21                                   |
| CNT-CNS-1 | 3.33                          | 30                                   |
| CNT-CNS-2 | 2.28                          | 44                                   |
| CNT-CNS-3 | 1.56                          | 64                                   |
| CNTs      | 0.07                          | 1428                                 |
